# Supplementary material for: Genotyping simplified: rationally designed antisense oligonucleotide-mediated PCR amplification-free colorimetric sensing of viral RNA in HCV genotypes 1 and 3
Source: Royal Society of Chemistry journal article supplement (doi:10.1039/d1an00590a), 2021-01-01
Supplement: d1an00590a1.pdf [file d1an00590a1.pdf]

## Supplementary Information

### Genotyping simplified: Rationally designed antisense oligonucleotide-mediated PCR amplification-free colorimetric sensing of viral RNA in HCV genotypes 1 and 3

Almas Shamaila Mohammed<sup>1,3</sup>, Aniket Balapure<sup>2</sup>, Aleem Ahmed Khan<sup>4</sup>, Mahammad Nanne Khaja<sup>3</sup>, Ramakrishnan Ganesan<sup>2\*</sup>, and Jayati Ray Dutta<sup>1\*</sup>

<sup>1</sup>Department of Biological Sciences, BITS Pilani Hyderabad Campus, Jawahar Nagar, Kapra Mandal, Medchal, Hyderabad- 500078, India

<sup>2</sup>Department of Chemistry, BITS Pilani Hyderabad Campus, Jawahar Nagar, Kapra Mandal, Medchal, Hyderabad-500078, India

<sup>3</sup>Bioviz Technologies Pvt. Ltd., Plot No. 46, UBI Colony, Road No. 3 Banjara Hills, Hyderabad-500034, India

<sup>4</sup>Centre for Liver Research & Diagnostics, Deccan College of Medical Sciences, Kanchan bagh, Hyderabad - 500058, India

**Table 1.** Viral load estimated by the RT-qPCR for the HCV, HIV and HBV positive samples used in the study

| Sample code | Viral load (IU/mL) | Sample code | Viral load (IU/mL) |
|-------------|--------------------|-------------|--------------------|
| G1/HCV-1    | 1146300            | G3/HCV-1    | 1128610            |
| G1/HCV-2    | 57000              | G3/HCV-2    | 9670               |
| G1/HCV-3    | 3033840            | G3/HCV-3    | 2069020            |
| G1/HCV-4    | 124970             | G3/HCV-4    | 512000             |
| G1/HCV-5    | 1144570            | G3/HCV-5    | 670000             |
| G1/HCV-6    | 794560             | G3/HCV-6    | 29800              |
| G1/HCV-7    | 1082570            | G3/HCV-7    | 12070              |
| G1/HCV-8    | 120650             | G3/HCV-8    | 700000             |
| G1/HCV-9    | 200000             | G3/HCV-9    | 864940             |
| G1/HCV-10   | 700000             | G3/HCV-10   | 3046770            |
| G1/HCV-11   | 16000              | G3/HCV-11   | 2611960            |
| G1/HCV-12   | 9380               | G3/HCV-12   | 1307010            |
| G1/HCV-13   | 33020              | G3/HCV-13   | 40000              |
| G1/HCV-14   | 454350             | G3/HCV-14   | 34760              |
| G1/HCV-15   | 2000000            | G3/HCV-15   | 44040              |
| G1/HCV-16   | 565450             | G3/HCV-16   | 779330             |
| G1/HCV-17   | 6480               | G3/HCV-17   | 62680              |
| G1/HCV-18   | 158740             | G3/HCV-18   | 84520              |
| HIV         | 125,500            | HBV         | 6,500              |

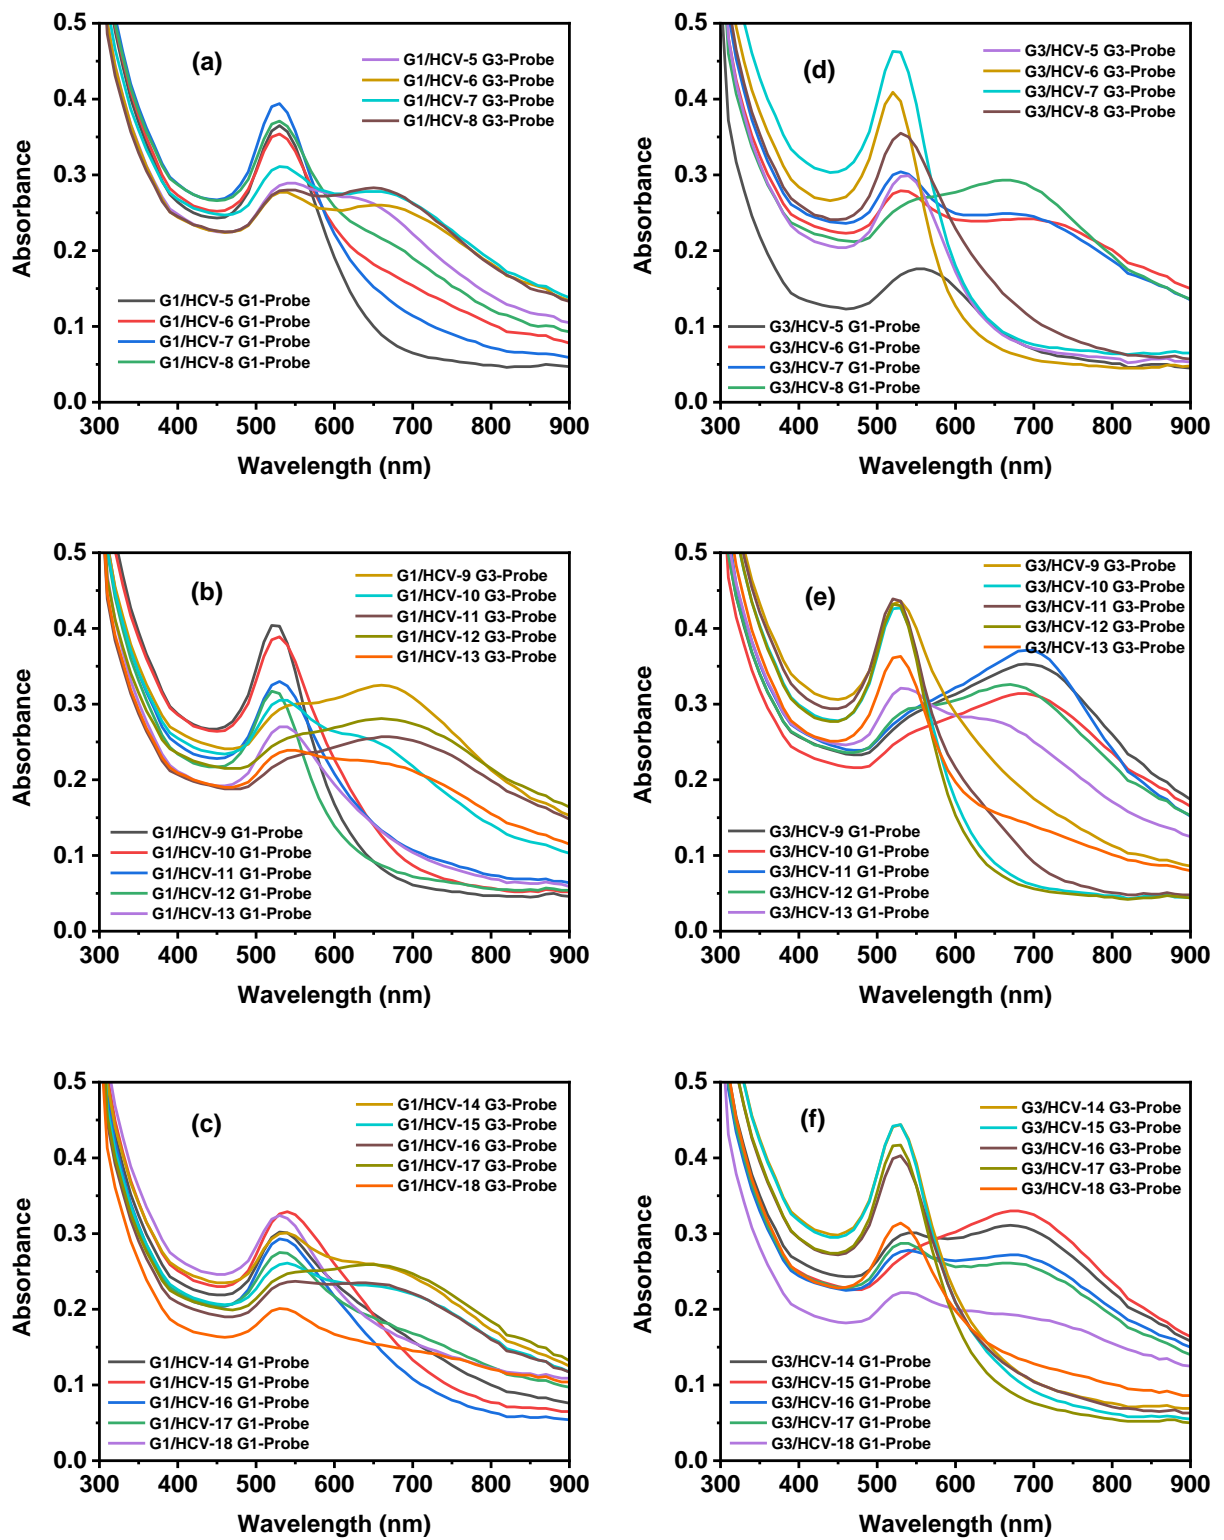

**Figure S1.** UV-visible spectra of HCV genotype 1 (a-c) and 3 (d-f) clinical samples tested with the Au NPs based assay against both G1 and G3 probes.

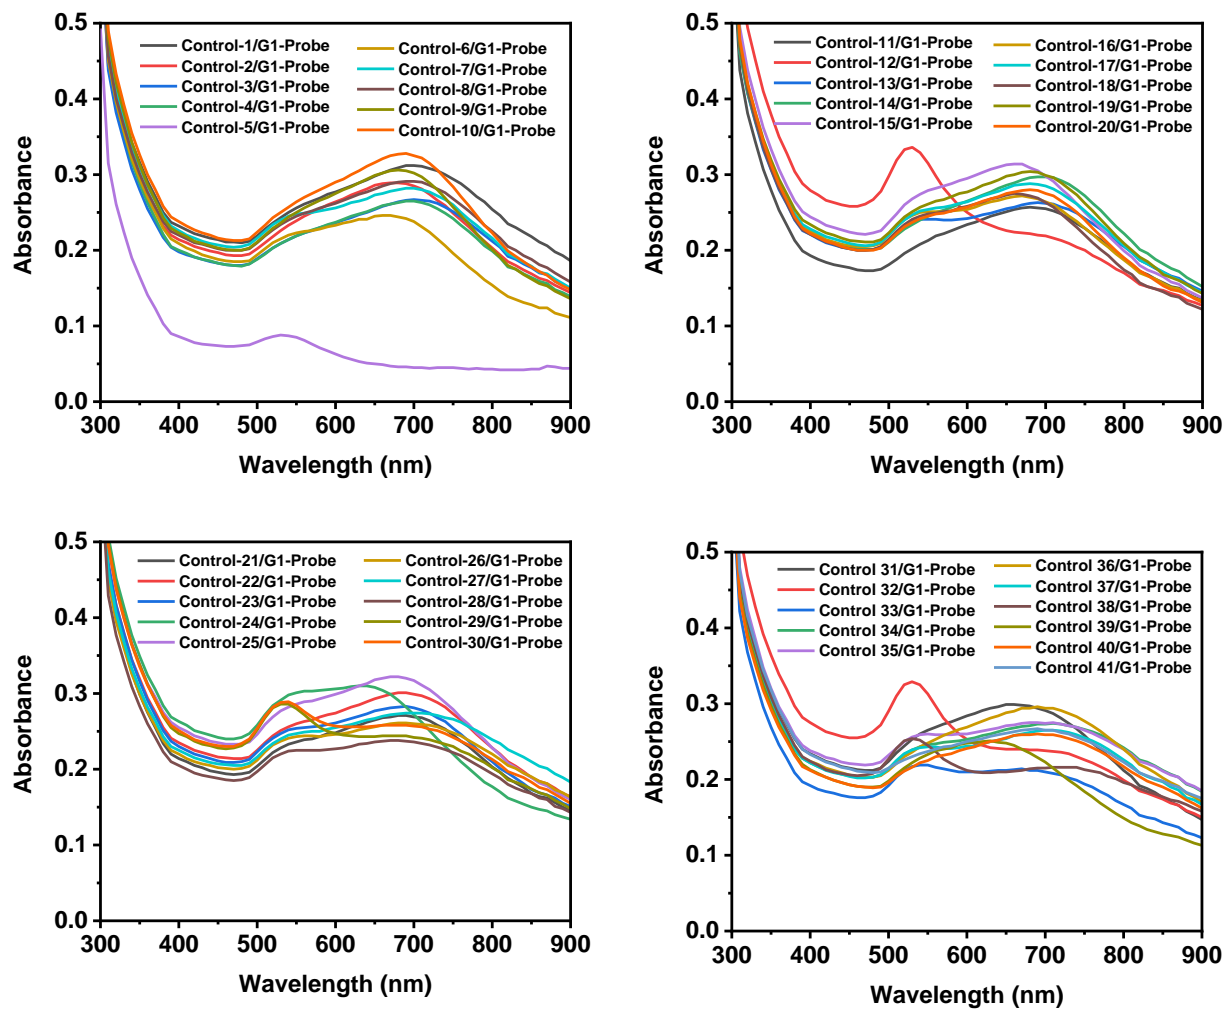

**Figure S2.** UV-visible spectra of healthy control samples tested against G1-probe with the Au NPs-based assay.

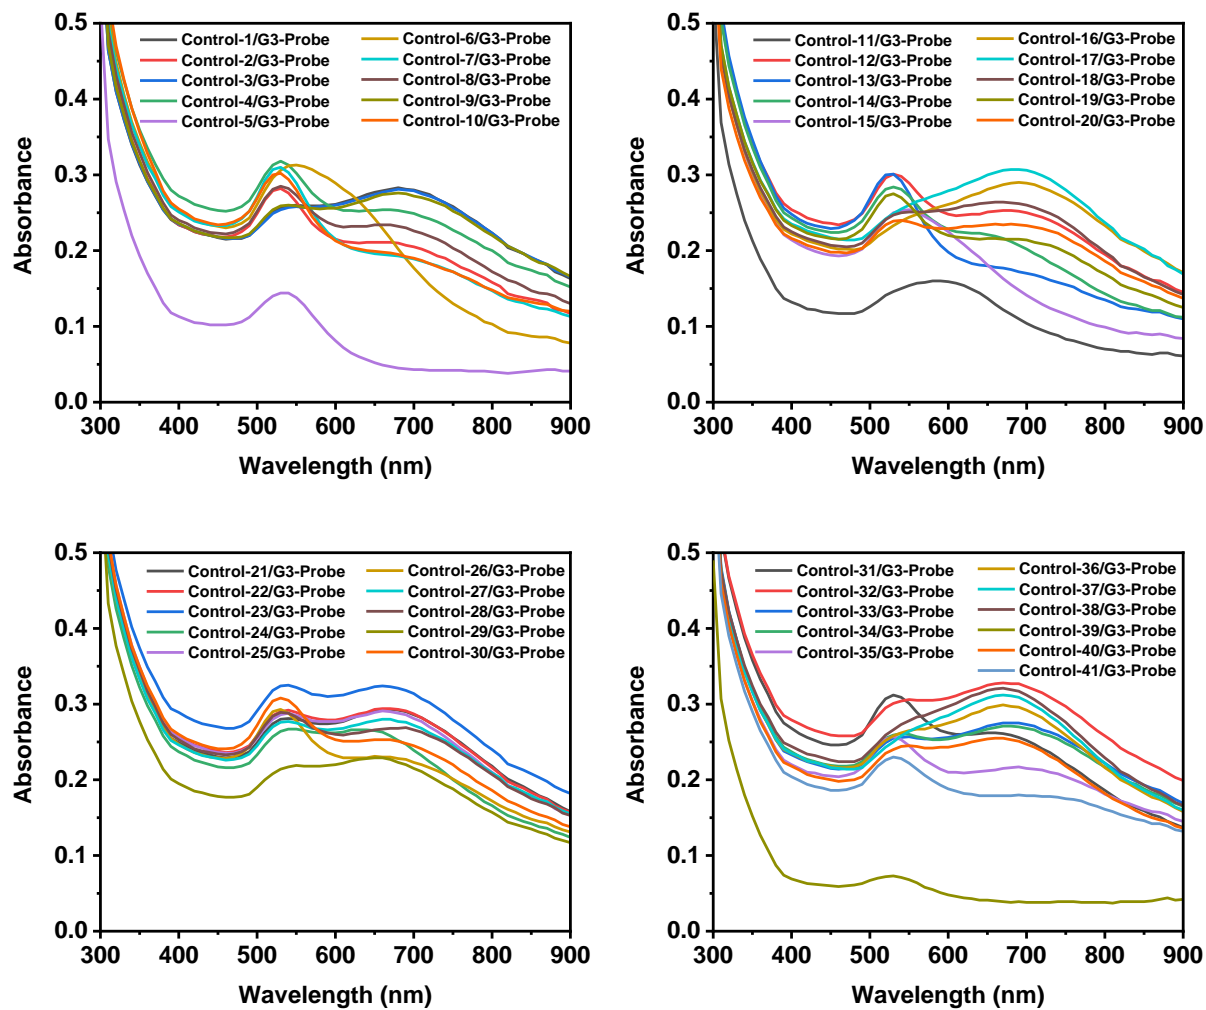

**Figure S3.** UV-visible spectra of healthy control samples tested against G3-probe with the Au NPs-based assay.

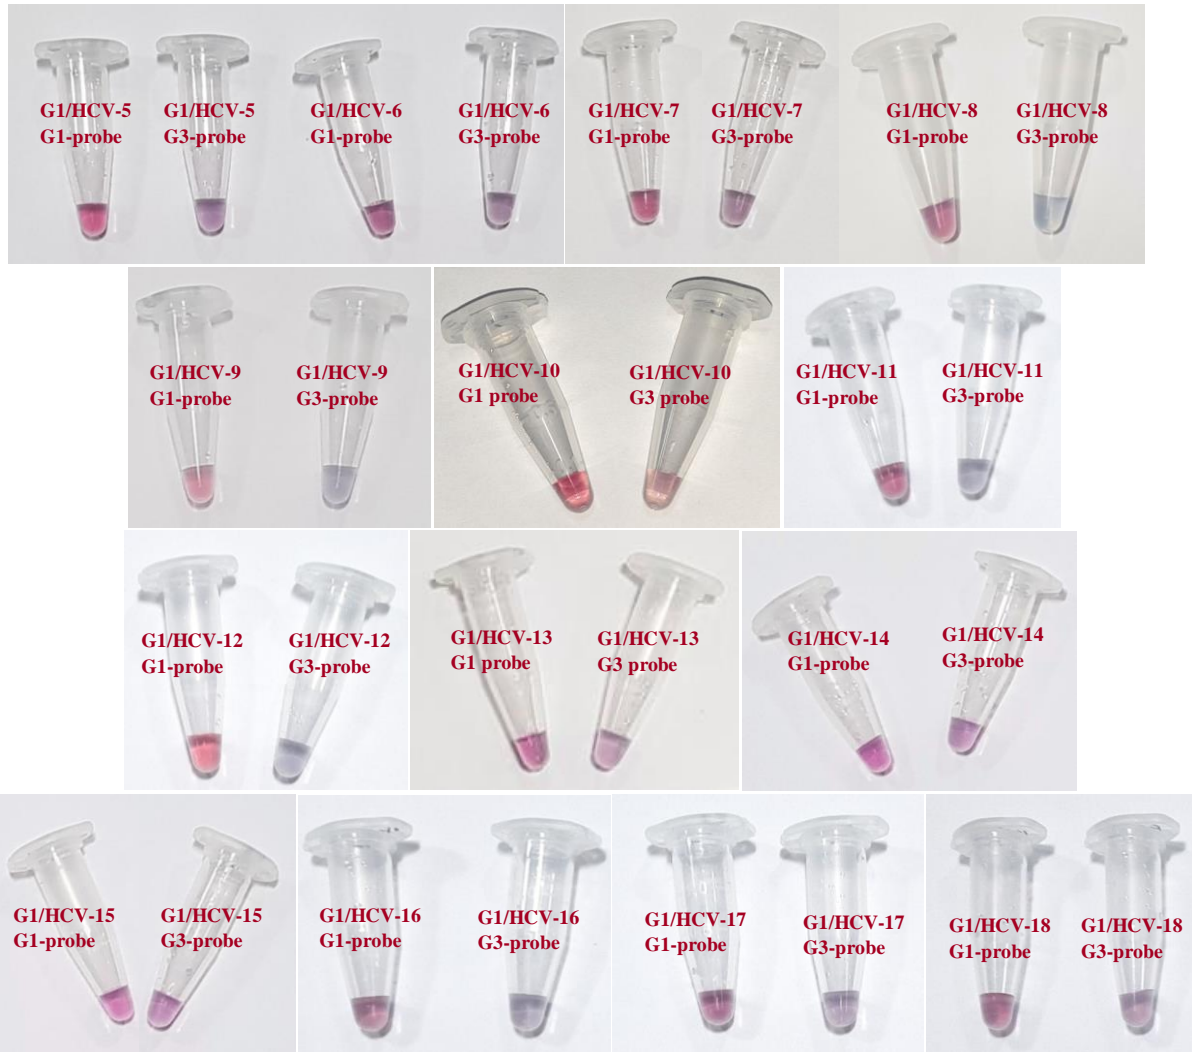

**Figure S4.** Digital photograph of the HCV genotype 1 clinical samples tested against both G1 and G3-probes in the Au NPs-based assay.

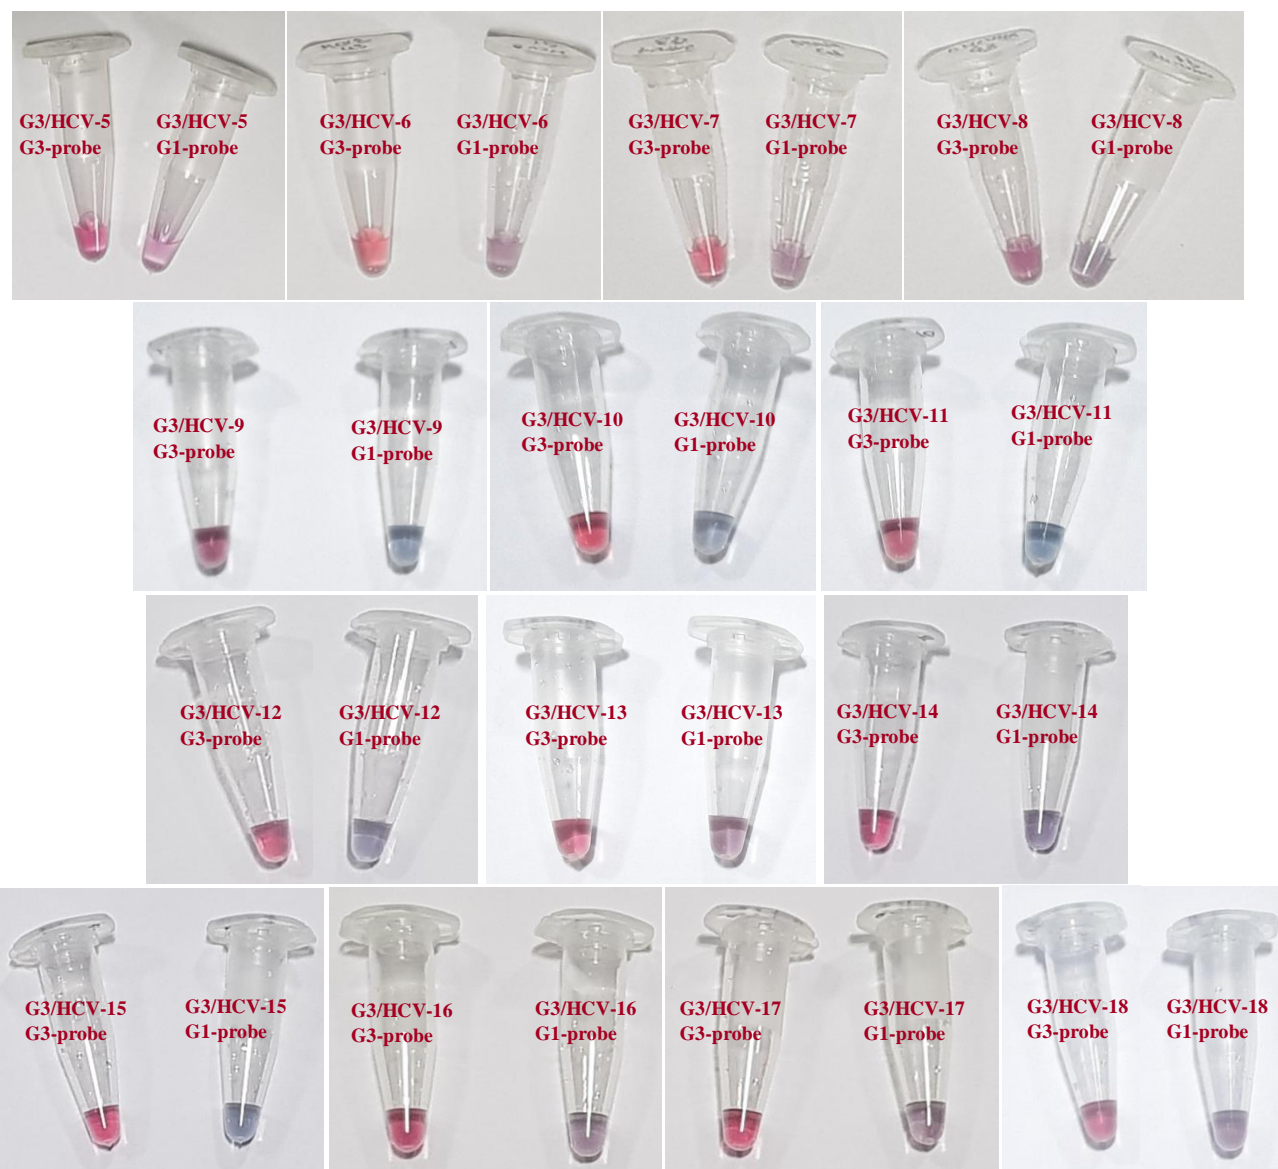

**Figure S5.** Digital photograph of the HCV genotype 3 clinical samples tested against both G1 and G3-probes in the Au NPs-based assay.

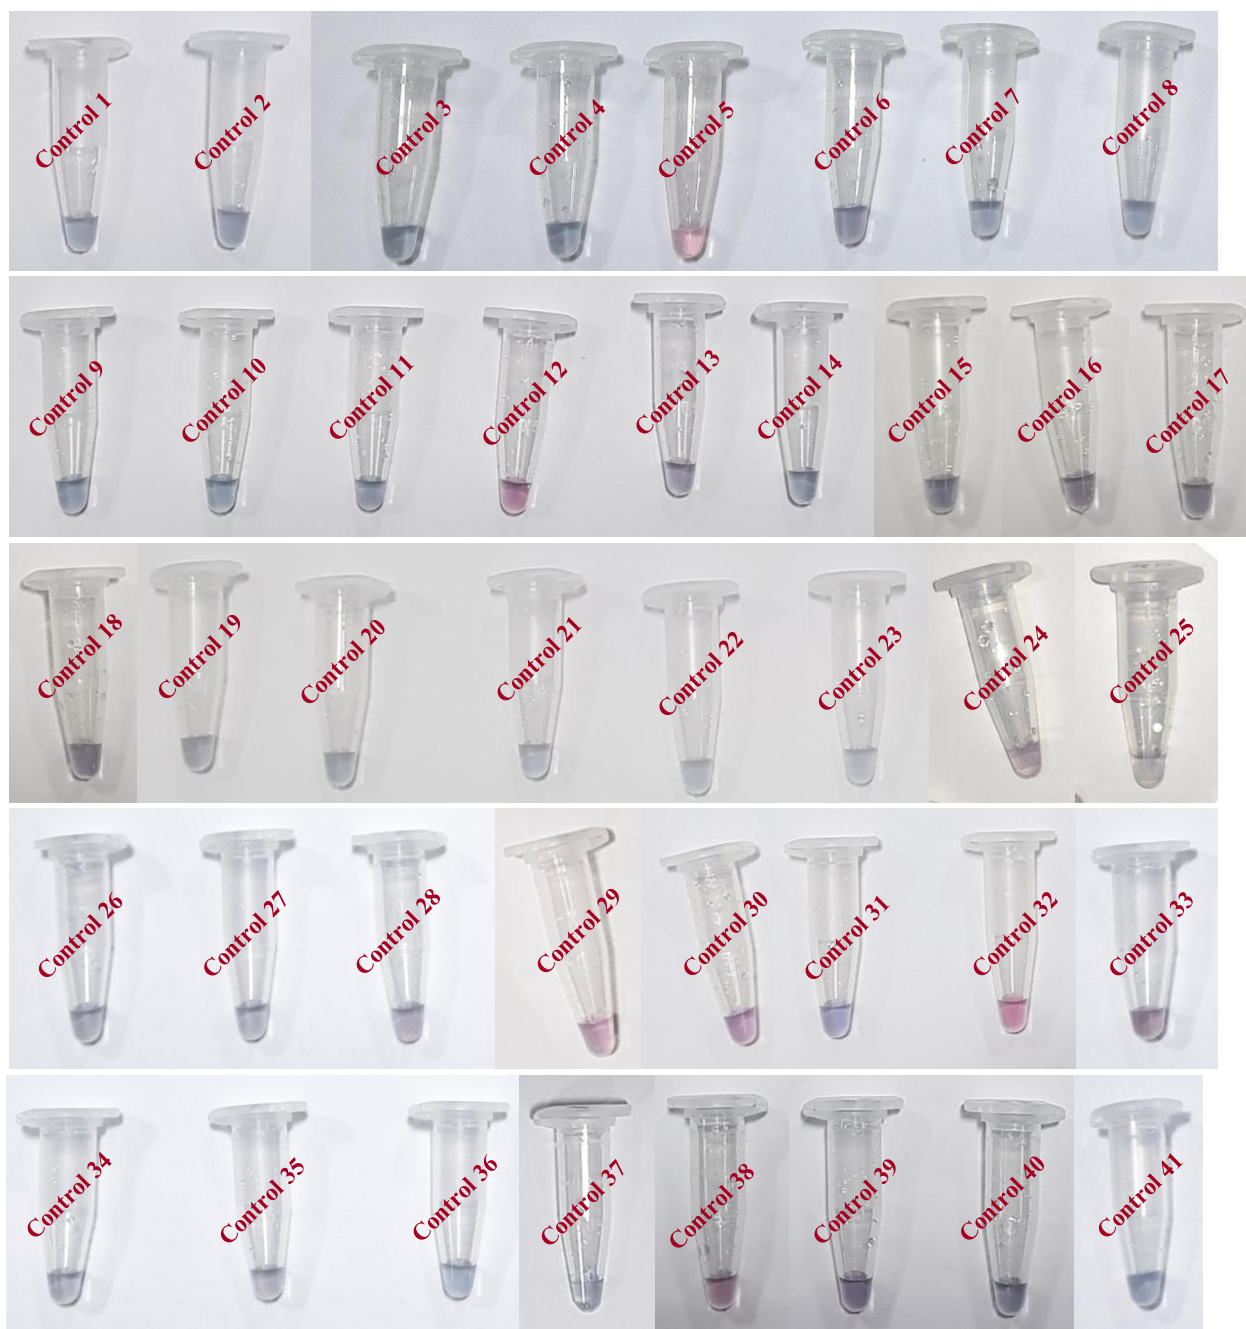

**Figure S6.** Digital photograph of the control clinical samples tested against G1-probe in the Au NPs-based assay.

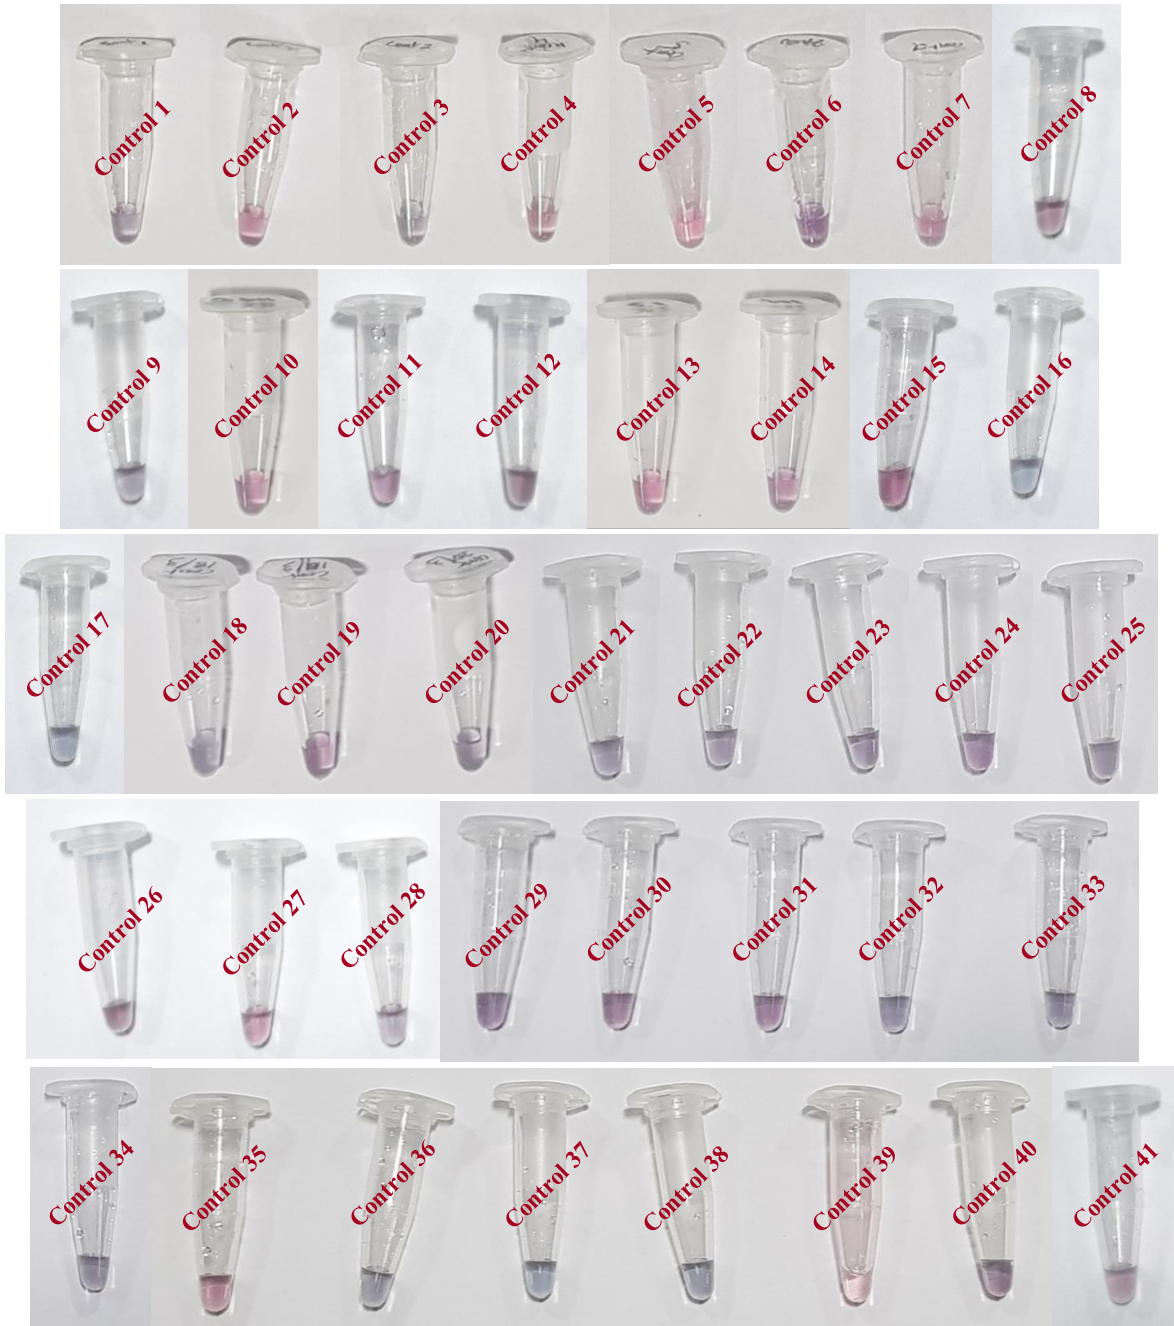

**Figure S7.** Digital photograph of the control clinical samples tested against G3-probe in the Au NPs-based assay.
